# Supplementary material for: Multifactorial effects of warming, low irradiance, and low salinity on Arctic kelps
Source: Copernicus journal article supplement (doi:10.5194/bg-21-4605-2024), 2024-10-25
Supplement: Supplementary file 1 [file bg-21-4605-2024-supplement.pdf]

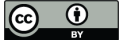

*Supplement of*

## **Multifactorial effects of warming, low irradiance, and low salinity on Arctic kelps**

**Anaïs Lebrun et al.**

*Correspondence to:* Cale A. Miller (c.a.miller@uu.nl)

The copyright of individual parts of the supplement might differ from the article licence.

1 **Supplementary material**

2

3 **RNAseq data**

4 The lists of differentially expressed genes (DEG) for *Hedophyllum nigripes* and *Saccharina*  
5 *latissima* represents 6 DEG files per species, or 12 files. These can be accessed and viewed  
6 accordingly by named CSV files, 1 per species. For each species, a CSV file contains the DEGs  
7 by function, with associated annotation:

8 1) [https://github.com/MarcMeynadier/SaccharinaHedophyllumTranscriptomic/tree/main/DE](https://github.com/MarcMeynadier/SaccharinaHedophyllumTranscriptomic/tree/main/DESeq2/Hedophyllum)  
9 [Seq2/Hedophyllum](https://github.com/MarcMeynadier/SaccharinaHedophyllumTranscriptomic/tree/main/DESeq2/Hedophyllum)

10 2) [https://github.com/MarcMeynadier/SaccharinaHedophyllumTranscriptomic/tree/main/DE](https://github.com/MarcMeynadier/SaccharinaHedophyllumTranscriptomic/tree/main/DESeq2/Saccharina)  
11 [Seq2/Saccharina](https://github.com/MarcMeynadier/SaccharinaHedophyllumTranscriptomic/tree/main/DESeq2/Saccharina)

12

13

14

15 **Table S1:** Tools and parameters used for transcriptomic data processing.

16

| Tool          | Version | Arguments and parameters                                                                                                                            |
|---------------|---------|-----------------------------------------------------------------------------------------------------------------------------------------------------|
| FastQC        | 0.11.7  | -o \$outputDirectory                                                                                                                                |
| Trimmomatic   | 0.39    | PE -threads 10 -phred33 -trimlog LEADING:3 TRAILING:3 SLIDINGWINDOW:4:15 MINLEN:36 TruSeq3-PE.fa:2:30:10                                            |
| Trinity       | 2.14.0  | --seqType fq --max_memory 128G --samples_file \$sampleFiles --CPU 32 --output \$outputDirectory --full_cleanup                                      |
| CD-HIT        | 4.8.1   | -i \$transcriptome -o \$output -c 0.95 -n 8                                                                                                         |
| rnaSPAdes     | 3.14.1  | --pe1-1 \$seq1 --pe1-2 \$seq2 [...] --pe4-1 \$seq7 --pe4-2 \$seq8 -o \$output_directory                                                             |
| BUSCO         | 5.4.3   | --in \$transcriptome --out \$output -c 24 -l /\$pathDB/eukaryota_odb10 --config \$config --mode transcriptome                                       |
| Kallisto      | 0.46.0  | quant -i \$index -o \$outputDirectory -b 100 -t 16 \$seq1 \$seq2                                                                                    |
| DESeq2        | 1.34.0  | Counts recovery via txlImport (files=DesignFile, type='Kallisto', tx2gene=tx2geneFile)<br>Contrasts depends on biological questions with alpha=0.05 |
| TransDecoder  | 5.5.0   | LongOrfs : \$transcriptome<br>Predict : \$transcriptome                                                                                             |
| HMMER         | 3.3     | --domtblout \$output -E 1e-10 --cpu 16 \$pfamDB \$transdecoderLongestOrf                                                                            |
| eggNOG-mapper | 2.1.10  | -i \$transdecoderLongestOrf -o \$eggnogAnnot                                                                                                        |
| Ontologizer   | 2.1     | -a \$associationFile -g \$goDB -s \$studySamples -p \$populationFile -c Parent-Child-Union -o \$outputDirectory -d 0.05 -r 1000                     |

17

18 **Table S2:** Analysis of deviance (Type II Wald chi-square tests) in a linear mixed model with  
19 a hierarchical structure to predict the chlorophyll a contents.

|                   | Chisq  | Df | Pr(>Chisq)    |
|-------------------|--------|----|---------------|
| species           | 91.310 | 2  | <2.2e-16 ***  |
| treatment         | 98.991 | 4  | <2.2e-16 ***  |
| species:treatment | 39.729 | 8  | 3.599e-06 *** |

20

21 **Table S3:** Pairwise comparisons of the chlorophyll *a* values calculated by the method of  
 22 Tukey on a linear mixed model with a hierarchical structure (fixed factors: treatment and  
 23 species, random factor: mesocosm). The *p*-values in bold (< 0.05) support the hypothesis that  
 24 there is a significant difference in the pair. AE: *Alaria esculenta*, LD: *Laminaria digitata*, SL:  
 25 *Saccharina latissima*.  
 26

| Species | Treatment | vs. | Species | Treatment | estimate | SE   | df    | t.ratio | p.value          |
|---------|-----------|-----|---------|-----------|----------|------|-------|---------|------------------|
| AE      | t0        | -   | LD      | t0        | 124.75   | 18.6 | 117.0 | 6.708   | <b>&lt;.0001</b> |
| AE      | t0        | -   | SL      | t0        | 104.37   | 18.6 | 117.0 | 5.612   | <b>&lt;.0001</b> |
| AE      | t0        | -   | AE      | Ctrl      | 136.06   | 19.0 | 22.9  | 7.146   | <b>&lt;.0001</b> |
| AE      | t0        | -   | AE      | T1        | 167.96   | 19.3 | 25.6  | 8.706   | <b>&lt;.0001</b> |
| AE      | t0        | -   | AE      | T2        | 48.68    | 20.4 | 30.6  | 2.388   | 0.5405           |
| AE      | t0        | -   | AE      | T3        | 155.52   | 21.2 | 33.5  | 7.325   | <b>&lt;.0001</b> |
| LD      | t0        | -   | SL      | t0        | -20.38   | 18.6 | 117.0 | -1.096  | 0.9988           |
| LD      | t0        | -   | LD      | Ctrl      | 49.65    | 27.8 | 69.5  | 1.783   | 0.8967           |
| LD      | t0        | -   | LD      | T1        | 54.29    | 24.0 | 38.6  | 2.260   | 0.6231           |
| LD      | t0        | -   | LD      | T2        | 56.08    | 27.8 | 69.5  | 2.014   | 0.7829           |
| LD      | t0        | -   | LD      | T3        | 60.95    | 23.5 | 43.6  | 2.588   | 0.4048           |
| SL      | t0        | -   | LD      | Ctrl      | 70.03    | 27.8 | 69.5  | 2.515   | 0.4437           |
| SL      | t0        | -   | SL      | Ctrl      | 79.06    | 18.0 | 20.0  | 4.396   | <b>0.0158</b>    |
| SL      | t0        | -   | SL      | T1        | 90.64    | 18.5 | 22.2  | 4.887   | <b>0.0044</b>    |
| SL      | t0        | -   | SL      | T2        | 89.20    | 18.0 | 19.9  | 4.953   | <b>0.0049</b>    |
| SL      | t0        | -   | SL      | T3        | 93.45    | 18.6 | 21.9  | 5.019   | <b>0.0034</b>    |
| AE      | Ctrl      | -   | LD      | Ctrl      | 38.33    | 27.2 | 117.8 | 1.409   | 0.9850           |
| AE      | Ctrl      | -   | SL      | Ctrl      | 47.36    | 17.0 | 118.9 | 2.779   | 0.2727           |
| AE      | Ctrl      | -   | AE      | T1        | 31.89    | 18.4 | 118.7 | 1.733   | 0.9184           |

|    |      |   |    |      |         |      |       |        |                  |
|----|------|---|----|------|---------|------|-------|--------|------------------|
| AE | Ctrl | - | AE | T2   | -87.38  | 19.4 | 117.9 | -4.497 | <b>0.0015</b>    |
| AE | Ctrl | - | AE | T3   | 19.46   | 20.3 | 118.6 | 0.958  | 0.9997           |
| LD | Ctrl | - | SL | Ctrl | 9.04    | 26.5 | 117.2 | 0.341  | 1.0000           |
| LD | Ctrl | - | LD | T1   | 4.64    | 30.9 | 119.0 | 0.150  | 1.0000           |
| LD | Ctrl | - | LD | T2   | 6.43    | 34.0 | 117.0 | 0.190  | 1.0000           |
| LD | Ctrl | - | LD | T3   | 11.30   | 30.5 | 118.0 | 0.370  | 1.0000           |
| SL | Ctrl | - | LD | T1   | -4.40   | 22.6 | 115.7 | -0.194 | 1.0000           |
| SL | Ctrl | - | SL | T1   | 11.58   | 16.5 | 118.4 | 0.702  | 1.0000           |
| SL | Ctrl | - | SL | T2   | 10.14   | 15.7 | 117.4 | 0.644  | 1.0000           |
| SL | Ctrl | - | SL | T3   | 14.39   | 16.4 | 117.3 | 0.878  | 0.9999           |
| AE | T1   | - | LD | T1   | 11.08   | 23.6 | 117.3 | 0.469  | 1.0000           |
| AE | T1   | - | SL | T1   | 27.05   | 17.9 | 118.0 | 1.511  | 0.9722           |
| AE | T1   | - | AE | T2   | -119.27 | 19.7 | 117.2 | -6.040 | <b>&lt;.0001</b> |
| AE | T1   | - | AE | T3   | -12.43  | 20.7 | 118.6 | -0.600 | 1.0000           |
| LD | T1   | - | SL | T1   | 15.98   | 22.6 | 119.0 | 0.707  | 1.0000           |
| LD | T1   | - | LD | T2   | 1.79    | 30.9 | 119.0 | 0.058  | 1.0000           |
| LD | T1   | - | LD | T3   | 6.66    | 26.4 | 118.0 | 0.252  | 1.0000           |
| SL | T1   | - | SL | T2   | -1.44   | 16.6 | 118.8 | -0.087 | 1.0000           |
| SL | T1   | - | SL | T3   | 2.81    | 17.2 | 118.9 | 0.163  | 1.0000           |
| AE | T2   | - | LD | T2   | 132.14  | 28.2 | 117.1 | 4.691  | <b>0.0007</b>    |
| AE | T2   | - | SL | T2   | 144.88  | 18.4 | 117.1 | 7.856  | <b>&lt;.0001</b> |
| AE | T2   | - | AE | T3   | 106.84  | 21.7 | 118.4 | 4.920  | <b>0.0003</b>    |
| LD | T2   | - | SL | T2   | 12.74   | 26.5 | 117.3 | 0.481  | 1.0000           |
| LD | T2   | - | LD | T3   | 4.87    | 30.5 | 118.0 | 0.159  | 1.0000           |
| SL | T2   | - | SL | T3   | 4.25    | 16.4 | 117.6 | 0.259  | 1.0000           |

|    |    |   |    |    |       |      |       |       |        |
|----|----|---|----|----|-------|------|-------|-------|--------|
| AE | T3 | - | LD | T3 | 30.17 | 24.5 | 118.1 | 1.231 | 0.9959 |
| AE | T3 | - | SL | T3 | 42.29 | 20.2 | 119.0 | 2.091 | 0.7381 |
| LD | T3 | - | SL | T3 | 12.12 | 22.6 | 119.0 | 0.537 | 1.0000 |

28 **Table S4:** C:N ratios (**A**), carbon contents (**B**), and nitrogen contents as a function of the  
 29 treatment were investigated with an analysis of deviance (Type II Wald chi-square tests) in a  
 30 linear mixed model with a hierarchical structure.  
 31

| <b>A</b>          | Chisq  | Df | Pr(>Chisq)    |
|-------------------|--------|----|---------------|
| species           | 61.003 | 2  | 5.667e-14 *** |
| treatment         | 29.275 | 4  | 6.872e-06 *** |
| species:treatment | 11.285 | 8  | 0.1861        |

| <b>B</b>          | Chisq   | Df | Pr(>Chisq)    |
|-------------------|---------|----|---------------|
| species           | 23.8694 | 2  | 6.559e-06 *** |
| treatment         | 3.8547  | 4  | 0.4260        |
| species:treatment | 6.0497  | 8  | 0.6417        |

| <b>C</b>          | Chisq  | Df | Pr(>Chisq)    |
|-------------------|--------|----|---------------|
| species           | 51.647 | 2  | 6.096e-12 *** |
| treatment         | 25.979 | 4  | 3.196e-05 *** |
| species:treatment | 14.373 | 8  | 0.07254       |



33 **Table S5:** Pairwise comparisons of **A)** the C:N ratios, **B)** the carbon contents, **C)** the nitrogen  
 34 contents calculated by the method of Tukey on a linear mixed model with a hierarchical  
 35 structure (fixed factors: treatment and species, random factor: mesocosm). The *p*-values in  
 36 bold (*p* < 0.05) indicates a significant difference in the pair. AE: *Alaria esculenta*, LD:  
 37 *Laminaria digitata*, SL: *Saccharina latissima*.  
 38

| A | Species | Treatment | vs. | Species | Treatment | estimate | SE   | df    | t.ratio | p.value       |
|---|---------|-----------|-----|---------|-----------|----------|------|-------|---------|---------------|
|   | AE      | to        | -   | LD      | to        | -0.1152  | 2.63 | 125.0 | -0.044  | 1.0000        |
|   | AE      | to        | -   | SL      | to        | -6.7996  | 2.56 | 125.0 | -2.654  | 0.3458        |
|   | AE      | to        | -   | AE      | Ctrl      | -0.4640  | 2.47 | 41.0  | -0.187  | 1.0000        |
|   | AE      | to        | -   | AE      | T1        | 5.2689   | 2.51 | 45.0  | 2.100   | 0.7276        |
|   | AE      | to        | -   | AE      | T2        | 6.7233   | 2.83 | 58.0  | 2.378   | 0.5403        |
|   | AE      | to        | -   | AE      | T3        | 5.8060   | 2.56 | 47.8  | 2.264   | 0.6201        |
|   | LD      | to        | -   | SL      | to        | -6.6845  | 2.56 | 125.0 | -2.609  | 0.3746        |
|   | LD      | to        | -   | LD      | Ctrl      | 9.4646   | 3.72 | 98.2  | 2.546   | 0.4190        |
|   | LD      | to        | -   | LD      | T1        | 5.3231   | 2.99 | 58.9  | 1.783   | 0.8955        |
|   | LD      | to        | -   | LD      | T2        | 7.2351   | 3.72 | 98.2  | 1.946   | 0.8236        |
|   | LD      | to        | -   | LD      | T3        | 4.4934   | 3.14 | 69.9  | 1.431   | 0.9814        |
|   | SL      | to        | -   | SL      | Ctrl      | 2.9358   | 2.36 | 36.1  | 1.246   | 0.9937        |
|   | SL      | to        | -   | SL      | T1        | 3.6898   | 2.22 | 31.4  | 1.659   | 0.9302        |
|   | SL      | to        | -   | SL      | T2        | 8.5439   | 2.32 | 34.5  | 3.686   | <b>0.0453</b> |
|   | SL      | to        | -   | SL      | T3        | 1.5997   | 2.36 | 35.2  | 0.677   | 1.0000        |
|   | AE      | Ctrl      | -   | LD      | Ctrl      | 9.8134   | 3.61 | 125.6 | 2.718   | 0.3066        |
|   | AE      | Ctrl      | -   | SL      | Ctrl      | -3.3998  | 2.28 | 126.8 | -1.490  | 0.9755        |
|   | AE      | Ctrl      | -   | AE      | T1        | 5.7328   | 2.34 | 126.1 | 2.449   | 0.4841        |
|   | AE      | Ctrl      | -   | AE      | T2        | 7.1873   | 2.67 | 126.2 | 2.694   | 0.3206        |
|   | AE      | Ctrl      | -   | AE      | T3        | 6.2700   | 2.41 | 126.7 | 2.599   | 0.3810        |

|    |      |   |    |      |          |      |       |        |               |
|----|------|---|----|------|----------|------|-------|--------|---------------|
| LD | Ctrl | - | SL | Ctrl | -13.2133 | 3.58 | 125.5 | -3.692 | <b>0.0247</b> |
| LD | Ctrl | - | LD | T1   | -4.1415  | 3.98 | 126.7 | -1.041 | 0.9993        |
| LD | Ctrl | - | LD | T2   | -2.2295  | 4.55 | 125.0 | -0.490 | 1.0000        |
| LD | Ctrl | - | LD | T3   | -4.9712  | 4.09 | 126.2 | -1.214 | 0.9965        |
| SL | Ctrl | - | SL | T1   | 0.7539   | 2.07 | 126.7 | 0.363  | 1.0000        |
| SL | Ctrl | - | SL | T2   | 5.6081   | 2.17 | 126.8 | 2.581  | 0.3927        |
| SL | Ctrl | - | SL | T3   | -1.3361  | 2.21 | 126.6 | -0.606 | 1.0000        |
| AE | T1   | - | LD | T1   | -0.0609  | 2.90 | 126.3 | -0.021 | 1.0000        |
| AE | T1   | - | SL | T1   | -8.3787  | 2.16 | 125.5 | -3.875 | <b>0.0136</b> |
| AE | T1   | - | AE | T2   | 1.4545   | 2.72 | 126.7 | 0.535  | 1.0000        |
| AE | T1   | - | AE | T3   | 0.5372   | 2.44 | 125.2 | 0.220  | 1.0000        |
| LD | T1   | - | SL | T1   | -8.3178  | 2.69 | 126.9 | -3.086 | 0.1367        |
| LD | T1   | - | LD | T2   | 1.9120   | 3.98 | 126.7 | 0.481  | 1.0000        |
| LD | T1   | - | LD | T3   | -0.8297  | 3.38 | 125.1 | -0.246 | 1.0000        |
| SL | T1   | - | SL | T2   | 4.8542   | 2.02 | 126.2 | 2.398  | 0.5214        |
| SL | T1   | - | SL | T3   | -2.0900  | 2.08 | 127.0 | -1.004 | 0.9995        |
| AE | T2   | - | LD | T2   | 0.3966   | 3.86 | 125.7 | 0.103  | 1.0000        |
| AE | T2   | - | SL | T2   | -4.9791  | 2.61 | 126.9 | -1.907 | 0.8453        |
| AE | T2   | - | AE | T3   | -0.9173  | 2.78 | 126.8 | -0.330 | 1.0000        |
| LD | T2   | - | SL | T2   | -5.3757  | 3.55 | 125.4 | -1.513 | 0.9721        |
| LD | T2   | - | LD | T3   | -2.7417  | 4.09 | 126.2 | -0.670 | 1.0000        |
| SL | T2   | - | SL | T3   | -6.9442  | 2.15 | 125.7 | -3.223 | 0.0967        |
| AE | T3   | - | LD | T3   | -1.4278  | 3.09 | 126.9 | -0.462 | 1.0000        |
| AE | T3   | - | SL | T3   | -11.0059 | 2.36 | 126.1 | -4.669 | <b>0.0007</b> |
| LD | T3   | - | SL | T3   | -9.5782  | 3.02 | 125.3 | -3.173 | 0.1101        |

| <b>B</b> | Species | Treatment | vs. | Species | Treatment | estimate | SE   | df    | t.ratio | p.value |
|----------|---------|-----------|-----|---------|-----------|----------|------|-------|---------|---------|
|          | AE      | to        | -   | LD      | to        | 5.634    | 14.1 | 125.0 | 0.400   | 1.0000  |
|          | AE      | to        | -   | SL      | to        | -6.839   | 13.7 | 125.0 | -0.498  | 1.0000  |
|          | AE      | to        | -   | AE      | Ctrl      | 3.002    | 13.3 | 41.0  | 0.226   | 1.0000  |
|          | AE      | to        | -   | AE      | T1        | 8.934    | 13.4 | 45.0  | 0.664   | 1.0000  |
|          | AE      | to        | -   | AE      | T2        | 10.408   | 15.2 | 58.0  | 0.687   | 1.0000  |
|          | AE      | to        | -   | AE      | T3        | 1.157    | 13.7 | 47.8  | 0.084   | 1.0000  |
|          | LD      | to        | -   | SL      | to        | -12.473  | 13.7 | 125.0 | -0.908  | 0.9999  |
|          | LD      | to        | -   | LD      | Ctrl      | 21.981   | 19.9 | 98.2  | 1.103   | 0.9987  |
|          | LD      | to        | -   | SL      | Ctrl      | -7.587   | 13.0 | 39.6  | -0.583  | 1.0000  |
|          | LD      | to        | -   | LD      | T1        | 24.351   | 16.0 | 58.9  | 1.521   | 0.9679  |
|          | LD      | to        | -   | LD      | T2        | 25.098   | 19.9 | 98.2  | 1.259   | 0.9947  |
|          | LD      | to        | -   | LD      | T3        | 28.694   | 16.8 | 69.9  | 1.705   | 0.9244  |
|          | SL      | to        | -   | SL      | Ctrl      | 4.886    | 12.6 | 36.1  | 0.387   | 1.0000  |
|          | SL      | to        | -   | SL      | T1        | 0.176    | 11.9 | 31.4  | 0.015   | 1.0000  |
|          | SL      | to        | -   | SL      | T2        | -0.691   | 12.4 | 34.5  | -0.056  | 1.0000  |
|          | SL      | to        | -   | SL      | T3        | -18.336  | 12.7 | 35.2  | -1.447  | 0.9761  |
|          | AE      | Ctrl      | -   | LD      | Ctrl      | 24.612   | 19.4 | 125.6 | 1.272   | 0.9944  |
|          | AE      | Ctrl      | -   | SL      | Ctrl      | -4.956   | 12.2 | 126.8 | -0.405  | 1.0000  |
|          | AE      | Ctrl      | -   | AE      | T1        | 5.932    | 12.5 | 126.1 | 0.473   | 1.0000  |
|          | AE      | Ctrl      | -   | AE      | T2        | 7.406    | 14.3 | 126.2 | 0.518   | 1.0000  |
|          | AE      | Ctrl      | -   | LD      | T2        | 27.730   | 19.4 | 125.6 | 1.433   | 0.9827  |
|          | AE      | Ctrl      | -   | AE      | T3        | -1.845   | 12.9 | 126.7 | -0.143  | 1.0000  |
|          | LD      | Ctrl      | -   | SL      | Ctrl      | -29.568  | 19.2 | 125.5 | -1.541  | 0.9674  |

|    |      |   |    |    |         |      |       |        |               |
|----|------|---|----|----|---------|------|-------|--------|---------------|
| LD | Ctrl | - | LD | T1 | 2.370   | 21.3 | 126.7 | 0.111  | 1.0000        |
| LD | Ctrl | - | SL | T1 | -34.278 | 18.7 | 125.0 | -1.831 | 0.8810        |
| LD | Ctrl | - | LD | T2 | 3.117   | 24.4 | 125.0 | 0.128  | 1.0000        |
| LD | Ctrl | - | LD | T3 | 6.713   | 22.0 | 126.2 | 0.306  | 1.0000        |
| SL | Ctrl | - | SL | T1 | -4.710  | 11.1 | 126.7 | -0.424 | 1.0000        |
| SL | Ctrl | - | SL | T2 | -5.577  | 11.6 | 126.8 | -0.479 | 1.0000        |
| SL | Ctrl | - | SL | T3 | -23.222 | 11.8 | 126.6 | -1.963 | 0.8153        |
| AE | T1   | - | LD | T1 | 21.051  | 15.5 | 126.3 | 1.355  | 0.9896        |
| AE | T1   | - | SL | T1 | -15.598 | 11.6 | 125.5 | -1.345 | 0.9903        |
| AE | T1   | - | AE | T2 | 1.474   | 14.6 | 126.7 | 0.101  | 1.0000        |
| AE | T1   | - | AE | T3 | -7.777  | 13.1 | 125.2 | -0.595 | 1.0000        |
| LD | T1   | - | SL | T1 | -36.648 | 14.4 | 126.9 | -2.537 | 0.4227        |
| LD | T1   | - | LD | T2 | 0.747   | 21.3 | 126.7 | 0.035  | 1.0000        |
| LD | T1   | - | LD | T3 | 4.343   | 18.1 | 125.1 | 0.240  | 1.0000        |
| SL | T1   | - | LD | T2 | 37.396  | 18.7 | 125.0 | 1.997  | 0.7962        |
| SL | T1   | - | SL | T2 | -0.867  | 10.9 | 126.2 | -0.080 | 1.0000        |
| SL | T1   | - | SL | T3 | -18.512 | 11.2 | 127.0 | -1.658 | 0.9414        |
| AE | T2   | - | AE | T3 | -9.251  | 14.9 | 126.8 | -0.621 | 1.0000        |
| LD | T2   | - | SL | T2 | -38.262 | 19.1 | 125.4 | -2.008 | 0.7896        |
| LD | T2   | - | LD | T3 | 3.596   | 22.0 | 126.2 | 0.164  | 1.0000        |
| SL | T2   | - | SL | T3 | -17.645 | 11.6 | 125.7 | -1.528 | 0.9697        |
| AE | T3   | - | LD | T3 | 33.171  | 16.6 | 126.9 | 2.001  | 0.7940        |
| AE | T3   | - | SL | T3 | -26.332 | 12.6 | 126.1 | -2.084 | 0.7429        |
| LD | T3   | - | SL | T3 | -59.503 | 16.2 | 125.3 | -3.677 | <b>0.0259</b> |

| C | Species | Treatment | vs. | Species | Treatment | estimate | SE   | df    | t.ratio | p.value       |
|---|---------|-----------|-----|---------|-----------|----------|------|-------|---------|---------------|
|   | AE      | to        | -   | LD      | to        | 0.2529   | 1.44 | 125.0 | 0.176   | 1.0000        |
|   | AE      | to        | -   | SL      | to        | 3.5217   | 1.40 | 125.0 | 2.508   | 0.4423        |
|   | AE      | to        | -   | AE      | Ctrl      | 0.0322   | 1.36 | 41.0  | 0.024   | 1.0000        |
|   | AE      | to        | -   | AE      | T1        | -2.8539  | 1.37 | 45.0  | -2.077  | 0.7425        |
|   | AE      | to        | -   | AE      | T2        | -3.8535  | 1.55 | 58.0  | -2.487  | 0.4650        |
|   | AE      | to        | -   | AE      | T3        | -3.8036  | 1.41 | 47.8  | -2.707  | 0.3318        |
|   | LD      | to        | -   | SL      | to        | 3.2689   | 1.40 | 125.0 | 2.328   | 0.5718        |
|   | LD      | to        | -   | LD      | Ctrl      | -5.7111  | 2.04 | 98.2  | -2.804  | 0.2626        |
|   | LD      | to        | -   | LD      | T1        | -1.4098  | 1.64 | 58.9  | -0.862  | 0.9999        |
|   | LD      | to        | -   | LD      | T2        | -3.1407  | 2.04 | 98.2  | -1.542  | 0.9665        |
|   | LD      | to        | -   | LD      | T3        | -1.0560  | 1.72 | 69.9  | -0.614  | 1.0000        |
|   | SL      | to        | -   | SL      | Ctrl      | -1.1248  | 1.29 | 36.1  | -0.871  | 0.9999        |
|   | SL      | to        | -   | SL      | T1        | -1.8877  | 1.22 | 31.4  | -1.550  | 0.9576        |
|   | SL      | to        | -   | SL      | T2        | -4.5131  | 1.27 | 34.5  | -3.554  | 0.0622        |
|   | SL      | to        | -   | SL      | T3        | -1.3004  | 1.30 | 35.2  | -1.004  | 0.9993        |
|   | AE      | Ctrl      | -   | LD      | Ctrl      | -5.4905  | 1.98 | 125.6 | -2.776  | 0.2740        |
|   | AE      | Ctrl      | -   | SL      | Ctrl      | 2.3647   | 1.25 | 126.8 | 1.892   | 0.8529        |
|   | AE      | Ctrl      | -   | AE      | T1        | -2.8861  | 1.28 | 126.1 | -2.251  | 0.6282        |
|   | AE      | Ctrl      | -   | AE      | T2        | -3.8856  | 1.46 | 126.2 | -2.659  | 0.3426        |
|   | AE      | Ctrl      | -   | AE      | T3        | -3.8358  | 1.32 | 126.7 | -2.902  | 0.2102        |
|   | LD      | Ctrl      | -   | SL      | Ctrl      | 7.8552   | 1.96 | 125.5 | 4.006   | <b>0.0087</b> |
|   | LD      | Ctrl      | -   | LD      | T1        | 4.3014   | 2.18 | 126.7 | 1.973   | 0.8098        |
|   | LD      | Ctrl      | -   | LD      | T2        | 2.5704   | 2.49 | 125.0 | 1.030   | 0.9994        |
|   | LD      | Ctrl      | -   | LD      | T3        | 4.6552   | 2.24 | 126.2 | 2.075   | 0.7485        |

|    |      |   |    |    |         |      |       |        |               |
|----|------|---|----|----|---------|------|-------|--------|---------------|
| SL | Ctrl | - | SL | T1 | -0.7629 | 1.14 | 126.7 | -0.671 | 1.0000        |
| SL | Ctrl | - | SL | T2 | -3.3883 | 1.19 | 126.8 | -2.846 | 0.2368        |
| SL | Ctrl | - | SL | T3 | -0.1756 | 1.21 | 126.6 | -0.145 | 1.0000        |
| AE | T1   | - | LD | T1 | 1.6970  | 1.59 | 126.3 | 1.069  | 0.9991        |
| AE | T1   | - | SL | T1 | 4.4880  | 1.18 | 125.5 | 3.788  | <b>0.0181</b> |
| AE | T1   | - | AE | T2 | -0.9995 | 1.49 | 126.7 | -0.670 | 1.0000        |
| AE | T1   | - | AE | T3 | -0.9497 | 1.34 | 125.2 | -0.711 | 1.0000        |
| LD | T1   | - | SL | T1 | 2.7910  | 1.48 | 126.9 | 1.890  | 0.8536        |
| LD | T1   | - | AE | T2 | -2.6966 | 1.72 | 126.8 | -1.568 | 0.9623        |
| LD | T1   | - | LD | T2 | -1.7310 | 2.18 | 126.7 | -0.794 | 1.0000        |
| LD | T1   | - | LD | T3 | 0.3538  | 1.85 | 125.1 | 0.191  | 1.0000        |
| SL | T1   | - | SL | T2 | -2.6254 | 1.11 | 126.2 | -2.367 | 0.5439        |
| SL | T1   | - | SL | T3 | 0.5873  | 1.14 | 127.0 | 0.515  | 1.0000        |
| AE | T2   | - | LD | T2 | 0.9656  | 2.12 | 125.7 | 0.456  | 1.0000        |
| AE | T2   | - | SL | T2 | 2.8621  | 1.43 | 126.9 | 2.001  | 0.7942        |
| AE | T2   | - | AE | T3 | 0.0498  | 1.52 | 126.8 | 0.033  | 1.0000        |
| LD | T2   | - | SL | T2 | 1.8965  | 1.95 | 125.4 | 0.974  | 0.9997        |
| LD | T2   | - | LD | T3 | 2.0848  | 2.24 | 126.2 | 0.929  | 0.9998        |
| SL | T2   | - | SL | T3 | 3.2127  | 1.18 | 125.7 | 2.721  | 0.3047        |
| AE | T3   | - | LD | T3 | 3.0005  | 1.69 | 126.9 | 1.771  | 0.9051        |
| AE | T3   | - | SL | T3 | 6.0250  | 1.29 | 126.1 | 4.665  | <b>0.0007</b> |
| LD | T3   | - | SL | T3 | 3.0244  | 1.65 | 125.3 | 1.829  | 0.8818        |

39  
40  
41  
42  
43  
44

45 **Table S6:** Analysis of deviance (Type II Wald chi-square tests) in a generalized linear mixed  
46 model to predict the growth rate.  
47

| <b>A</b>          | Chisq  | Df | Pr(>Chisq)    |
|-------------------|--------|----|---------------|
| species           | 91.310 | 2  | <2.2e-16 ***  |
| treatment         | 98.991 | 4  | <2.2e-16 ***  |
| species:treatment | 39.729 | 8  | 3.599e-16 *** |

48  
49  
50  
51  
52  
53  
54  
55  
56  
57  
58  
59  
60  
61  
62  
63  
64  
65  
66  
67  
68  
69  
70  
71  
72  
73  
74  
75  
76  
77  
78

79 **Table S7:** Pairwise comparisons of the growth rates calculated by the method of Tukey  
80 generalized linear mixed model. The *p*-values in bold ( $p < 0.05$ ) support the hypothesis that  
81 there is a significant difference in the pair. AE: *Alaria esculenta*, LD: *Laminaria digitata*, SL:  
82 *Saccharina latissima*.  
83

| A | Species | Treatment | vs. | Species | Treatment | estimate  | SE     | df  | t.ratio | p.value          |
|---|---------|-----------|-----|---------|-----------|-----------|--------|-----|---------|------------------|
|   | AE      | Ctrl      | -   | LD      | Ctrl      | -6.78e-03 | 0.0327 | 115 | -0.207  | 1.0000           |
|   | AE      | Ctrl      | -   | SL      | Ctrl      | -1.87e-01 | 0.0264 | 115 | -7.09   | <b>&lt;.0001</b> |
|   | AE      | Ctrl      | -   | AE      | T1        | 4.08e-03  | 0.0275 | 115 | 0.148   | 1.0000           |
|   | AE      | Ctrl      | -   | AE      | T2        | 2.62e-03  | 0.0299 | 115 | 0.088   | 1.0000           |
|   | AE      | Ctrl      | -   | AE      | T3        | 4.49e-03  | 0.0282 | 115 | 0.159   | 1.0000           |
|   | LD      | Ctrl      | -   | SL      | Ctrl      | -1.80e-01 | 0.0318 | 115 | -5.672  | <b>&lt;.0001</b> |
|   | LD      | Ctrl      | -   | LD      | T1        | -2.73e-03 | 0.034  | 115 | -0.08   | 1.0000           |
|   | LD      | Ctrl      | -   | LD      | T2        | 3.85e-03  | 0.0358 | 115 | 0.107   | 1.0000           |
|   | LD      | Ctrl      | -   | LD      | T3        | 9.32e-03  | 0.034  | 115 | 0.275   | 1.0000           |
|   | SL      | Ctrl      | -   | SL      | T1        | -1.54e-02 | 0.0248 | 115 | -0.622  | 1.0000           |
|   | SL      | Ctrl      | -   | SL      | T2        | 4.00e-03  | 0.0244 | 115 | 0.164   | 1.0000           |
|   | SL      | Ctrl      | -   | SL      | T3        | -9.63e-03 | 0.0248 | 115 | -0.388  | 1.0000           |
|   | AE      | T1        | -   | LD      | T1        | -1.36e-02 | 0.029  | 115 | -0.469  | 1.0000           |
|   | AE      | T1        | -   | SL      | T1        | -2.07e-01 | 0.026  | 115 | -7.961  | <b>&lt;.0001</b> |
|   | AE      | T1        | -   | AE      | T2        | -1.45e-03 | 0.0299 | 115 | -0.049  | 1.0000           |
|   | AE      | T1        | -   | AE      | T3        | 4.14e-04  | 0.0282 | 115 | 0.015   | 1.0000           |
|   | LD      | T1        | -   | SL      | T1        | -1.93e-01 | 0.0275 | 115 | -7.014  | <b>&lt;.0001</b> |
|   | LD      | T1        | -   | LD      | T2        | 6.57e-03  | 0.0325 | 115 | 0.202   | 1.0000           |
|   | LD      | T1        | -   | SL      | T2        | -1.74e-01 | 0.0272 | 115 | -6.392  | <b>&lt;.0001</b> |
|   | LD      | T1        | -   | LD      | T3        | 1.20e-02  | 0.0304 | 115 | 0.397   | 1.0000           |
|   | LD      | T1        | -   | SL      | T3        | -1.87e-01 | 0.0275 | 115 | -6.803  | <b>&lt;.0001</b> |



|    |    |   |    |    |           |        |     |        |        |
|----|----|---|----|----|-----------|--------|-----|--------|--------|
| SL | T1 | - | SL | T2 | 1.94e-02  | 0.0239 | 115 | 0.812  | 0.9996 |
| SL | T1 | - | SL | T3 | 5.81e-03  | 0.0244 | 115 | 0.239  | 1.0000 |
| AE | T2 | - | LD | T2 | -5.56e-03 | 0.0333 | 115 | -0.167 | 1.0000 |
| AE | T2 | - | SL | T2 | -1.86e-01 | 0.0282 | 115 | -6.586 | <.0001 |
| AE | T2 | - | AE | T3 | 1.87e-03  | 0.0306 | 115 | 0.061  | 1.0000 |
| LD | T2 | - | SL | T2 | -1.80e-01 | 0.0295 | 115 | -6.111 | <.0001 |
| LD | T2 | - | LD | T3 | 5.48e-03  | 0.0325 | 115 | 0.169  | 1.0000 |
| SL | T2 | - | SL | T3 | -1.36e-02 | 0.0239 | 115 | -0.569 | 1.0000 |
| AE | T3 | - | LD | T3 | -1.95e-03 | 0.0296 | 115 | -0.066 | 1.0000 |
| AE | T3 | - | SL | T3 | -2.01e-01 | 0.0267 | 115 | -7.545 | <.0001 |
| LD | T3 | - | SL | T3 | -1.99e-01 | 0.0275 | 115 | -7.241 | <.0001 |

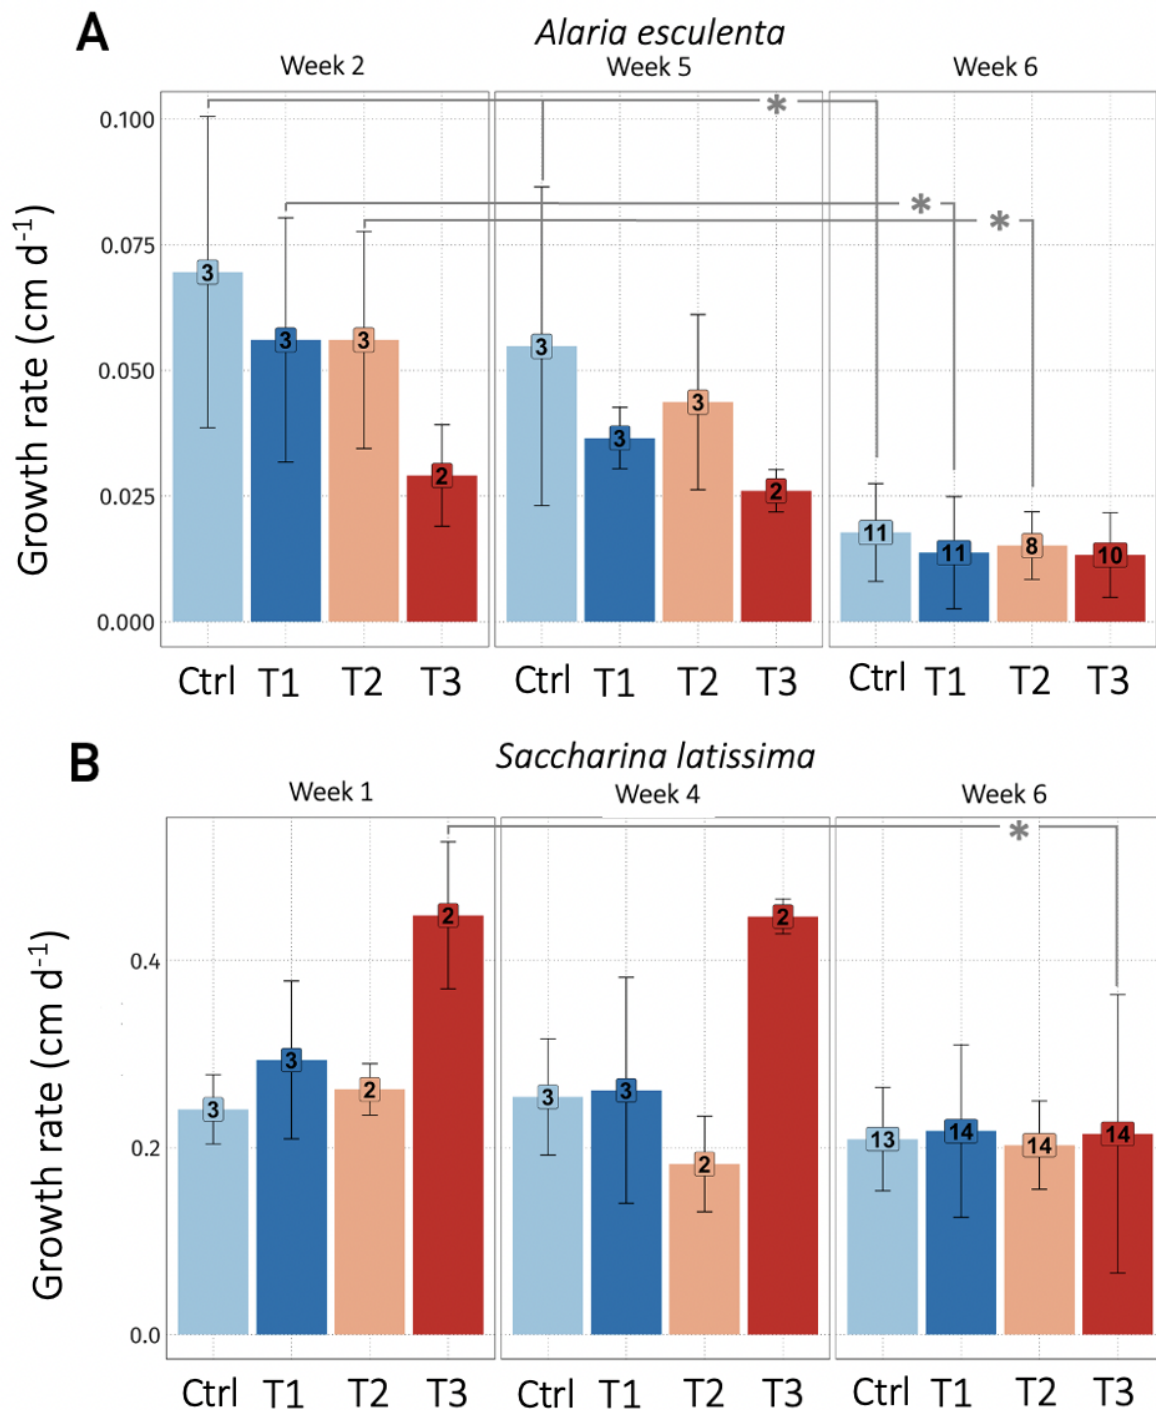

84

85 **Figure S1:** Growth rate calculated at different intervals during the experiment within  
 86 treatments for **A)** *Alaria esculenta* (Week 0 to 2, 2 to 5, and 5 to 6), and **B)** *Saccharina latissima*  
 87 (Weeks 0 to 1, 1 to 4, and 4 to 6). The number on each barplot corresponds to the sample size.  
 88 *Laminaria digitata* was not represented due to its low sample size in week 3. Values from  $t_0$  to  
 89 week 6 are represented in Figure 5. A generalized linear mixed model (GLMM) with a  
 90 Gaussian distribution was used to test for the effects of the species, treatment, time, and

91 mesocosm replica. No significant differences were found between mesocosm replicas.

92 Statistically significant differences are shown with an asterisk ( $p < 0.05$ ).

93

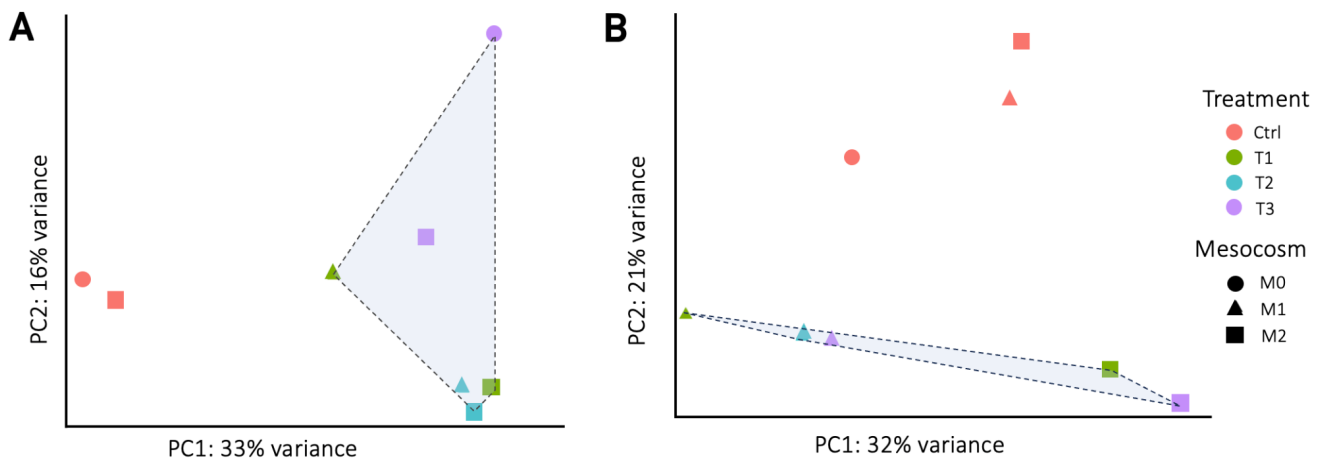

94 **Fig. S2:** Principal Component Analysis of the expressed genes in the control and treatments of  
 95 **A) *Hedophyllum nigripes*** and **B) *Saccharina latissima***. Treatments T1, T2, and T3 are grouped  
 96 in the blue geometrical figures.  
 97
